# Supplementary material
Source: HighWire-hosted journal article supplement (https://jnis.bmj.com/content/15/11/1078)
Supplement: inline-supplementary-material-1 [file inline-supplementary-material-1.pdf]

## Supplementary Materials

### **Effect of prolonged microcirculation time after thrombectomy on the outcome of acute stroke**

#### Contents

Supplementary Figure 1

Figure S1. Flow chart of the inclusion of the study population

Supplementary Tables 5

Table S1. Baseline Clinical Characteristics of Patients with High and Low mCCT Groups

Table S2. Logistic Regression Analyses for mCCT>3.68 s

Table S3 Baseline Clinical Characteristics of Patients with and without Intracerebral Hemorrhage

Table S4 Logistic Regression Analyses for Intracerebral Hemorrhage

Table S5 Kendall's W test for TTP and CCT

## Supplementary Figures

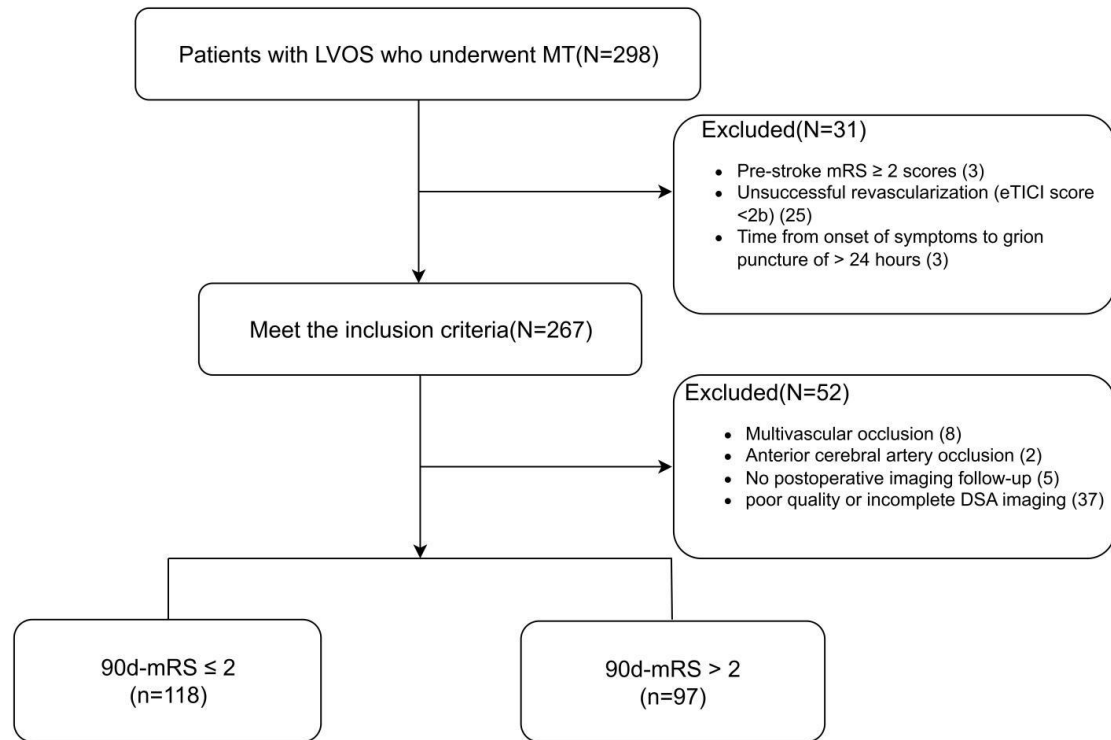

**Figure S1** Flow chart of the inclusion of the study population.

LVOS, large vessel occlusive stroke; mRS, modified Rankin Scale; MT, mechanical thrombectomy; eTICI, expanded Thrombolysis in Cerebral Infarction

**Table S1** Baseline Clinical Characteristics of Patients with High and Low mCCT Groups

| Variables                       | mCCT≤3.68<br>(n=122) | mCCT>3.68<br>(n=93) | P-value |
|---------------------------------|----------------------|---------------------|---------|
| Demographic characteristics     |                      |                     |         |
| Age, y, median (IQR)            | 68(60,76)            | 71(64,77)           | 0.097   |
| Male, n (%)                     | 76(62.3)             | 49(52.7)            | 0.157   |
| Past Medical History, n (%)     |                      |                     |         |
| Hypertension                    | 66(54.1)             | 61(65.6)            | 0.090   |
| Diabetes mellitus               | 11(9.0)              | 11(11.8)            | 0.500   |
| Atrial fibrillation             | 67(54.9)             | 57(61.3)            | 0.349   |
| Clinical data                   |                      |                     |         |
| Admission SBP, median (IQR)     | 150(137,167)         | 158(139,170)        | 0.154   |
| Admission DBP, median (IQR)     | 85(77,92)            | 82(74,93)           | 0.681   |
| Admission NIHSS, median, (IQR)  | 13(11,17)            | 14(12,18)           | 0.057   |
| Admission ASPECT, median, (IQR) | 9(7,10)              | 8(7,10)             | 0.255   |
| IV-rtPA, n (%)                  | 13(10.7)             | 19(20.4)            | 0.046   |
| Occlusion site, n (%)           |                      |                     | 0.663   |
| ICA                             | 49(40.2)             | 42(45.2)            |         |
| MCA-M1                          | 64(52.5)             | 43(46.2)            |         |
| MCA-M2                          | 9(7.4)               | 8(8.6)              |         |
| Tandem occlusion                | 16(13.1)             | 7(7.5)              | 0.189   |
| TOAST type, n (%)               |                      |                     | 0.253   |
| LAA                             | 32(26.2)             | 25(26.9)            |         |
| CE                              | 72(59.0)             | 61(65.6)            |         |
| Others                          | 18(14.8)             | 7(7.5)              |         |
| Anesthesia mode, n (%)          |                      |                     | 0.911   |
| General Anesthesia              | 13(10.7)             | 11(11.8)            |         |
| Local Anesthesia                | 73(59.8)             | 53(57.0)            |         |
| Conscious Sedation              | 36(29.5)             | 29(31.2)            |         |
| Procedure process               |                      |                     |         |
| OTP, median (IQR)               | 293(210,360)         | 312(240,420)        | 0.029   |
| OTR, median (IQR)               | 350(260,440)         | 373(280,506)        | 0.049   |
| Collateral, n (%)               |                      |                     | 0.996   |
| poor                            | 38(31.1)             | 29(31.2)            |         |
| good                            | 84(68.9)             | 64(68.8)            |         |
| First Attempt Approach, n (%)   |                      |                     | 0.252   |
| Stent retriever                 | 40(32.8)             | 19(20.4)            |         |
| Direct aspiration               | 54(44.3)             | 48(51.6)            |         |
| Stent retriever + aspiration    | 7(5.7)               | 6(6.5)              |         |
| Balloon/stenting angioplasty    | 21(17.2)             | 20(21.5)            |         |
| eTICI                           |                      |                     | <0.001  |

|                                 |          |          |       |
|---------------------------------|----------|----------|-------|
| 2b50 (50-66%)                   | 9(7.4)   | 19(20.4) |       |
| 2b67 (67-89%)                   | 6(4.9)   | 21(22.6) |       |
| 2c                              | 21(17.2) | 12(12.9) |       |
| 3                               | 86(70.5) | 41(44.1) |       |
| Any ICH within 24h              | 23(18.9) | 30(32.3) | 0.024 |
| Parenchymal hematoma within 24h | 8(6.6)   | 14(15.1) | 0.042 |
| Symptomatic ICH within 24h      | 4(3.3)   | 7(7.5)   | 0.214 |

**Abbreviations:** ASPECT, Alberta Stroke Program Early CT; CE, cardioembolic; DBP, diastolic blood pressure; eTICI, expanded Thrombolysis in Cerebral Infarction; ICA, internal carotid artery; ICH, intracerebral hemorrhage, IQR, interquartile range; IV-rtPA, intravenous alteplase; LAA, large-artery atherosclerosis; MCA-M1, M1 segment of the middle cerebral artery; MCA-M2, M2 segment of the middle cerebral artery; mCCT, microvascular cerebral circulation time; mRS, modified Rankin Scale; NIHSS, National Institutes of Health Stroke Scale; OTP, onset-to-puncture time; OTR, onset-to-reperfusion time; SBP, systolic blood pressure; SD, standard deviation; TOAST, the Trial of ORG 10172 in Acute Stroke Treatment

**Table S2 Logistic Regression Analyses for mCCT>3.68 s**

| Independent variable | Aadjusted OR(95%CI) | P-value |
|----------------------|---------------------|---------|
| Model1               |                     |         |
| OTP                  | 1.001(0.999-1.002)  | 0.238   |
| IV-rtPA              | 1.686(0.739-3.847)  | 0.215   |
| eTICI                |                     |         |
| 2b50                 | Reference           |         |
| 2b67                 | 1.575(0.467-5.313)  | 0.464   |
| 2c                   | 0.285(0.098-0.833)  | 0.022   |
| 3                    | 0.233(0.097-0.563)  | 0.001   |
| Model2               |                     |         |
| OTR                  | 1.001(0.999-1.002)  | 0.210   |
| IV-rtPA              | 1.701(0.745-3.886)  | 0.208   |
| eTICI                |                     |         |
| 2b50                 | Reference           |         |
| 2b67                 | 1.545(0.458-5.215)  | 0.483   |
| 2c                   | 0.285(0.098-0.831)  | 0.022   |
| 3                    | 0.227(0.094-0.548)  | 0.001   |

**Abbreviations:** CI, confidence intervals; eTICI, expanded Thrombolysis in Cerebral Infarction; IV-rtPA, intravenous alteplase; mCCT, microvascular cerebral circulation time; OR, odds ratio; OTP, onset-to-puncture time; OTR, onset-to-reperfusion time

**Table S3 Baseline Clinical Characteristics of Patients with and without Intracerebral Hemorrhage**

| Variables                          | Any ICH(+)<br>(n=53) | Any ICH(-)<br>(n=162) | P-value | Parenchymal<br>hematoma(+)<br>(n=22) | Parenchymal<br>hematoma(-)<br>(n=193) | P-value |
|------------------------------------|----------------------|-----------------------|---------|--------------------------------------|---------------------------------------|---------|
| <b>Demographic characteristics</b> |                      |                       |         |                                      |                                       |         |
| Age, y, median (IQR)               | 73(66-77)            | 69(61-76)             | 0.020   | 77(71-79)                            | 69(62-76)                             | 0.017   |
| Male, n (%)                        | 27(50.9)             | 98(60.5)              | 0.221   | 10(45.5)                             | 115(59.6)                             | 0.203   |
| <b>Past Medical History, n (%)</b> |                      |                       |         |                                      |                                       |         |
| Hypertension                       | 29(54.7)             | 98(60.5)              | 0.458   | 13(59.1)                             | 114(59.1)                             | 0.998   |
| Diabetes mellitus                  | 3(5.7)               | 19(11.7)              | 0.297   | 2(9.1)                               | 20(10.4)                              | 1.000   |
| Atrial fibrillation                | 39(73.6)             | 85(52.2)              | 0.007   | 19(86.4)                             | 105(54.4)                             | 0.005   |
| <b>Clinical data</b>               |                      |                       |         |                                      |                                       |         |
| Admission SBP, median (IQR)        | 148(134-168)         | 154(140-169)          | 0.247   | 149(128-166)                         | 153(140-169)                          | 0.219   |
| Admission DBP, median (IQR)        | 84(76-90)            | 84(75-94)             | 0.692   | 87(71-91)                            | 84(75-93)                             | 0.554   |
| Admission NIHSS, median, (IQR)     | 14(12-17)            | 13(11-18)             | 0.230   | 15(12-18)                            | 13(11-18)                             | 0.114   |
| Admission ASPECT, median, (IQR)    | 7(4-9)               | 9(8-10)               | <0.001  | 7(3-9)                               | 9(7-10)                               | <0.001  |
| IV-rtPA, n (%)                     | 13(24.5)             | 19(11.7)              | 0.023   | 6(27.3)                              | 26(13.5)                              | 0.085   |
| Occlusion site, n (%)              |                      |                       | 0.061   |                                      |                                       | 0.067   |
| ICA                                | 28(52.8)             | 63(38.9)              |         | 11(50.0)                             | 80(41.5)                              |         |
| MCA-M1                             | 19(35.8)             | 88(54.3)              |         | 7(31.8)                              | 100(51.8)                             |         |
| MCA-M2                             | 6(11.3)              | 11(6.8)               |         | 4(18.2)                              | 13(6.7)                               |         |
| TOAST type, n (%)                  |                      |                       | 0.001   |                                      |                                       | -       |
| LAA                                | 5(9.4)               | 52(32.1)              |         | 0(0.0)                               | 57(29.5)                              |         |
| CE                                 | 43(81.1)             | 90(55.6)              |         | 22(100%)                             | 111(57.5)                             |         |
| Others                             | 5(9.4)               | 20(12.3)              |         | 0(0.0)                               | 25(13.0)                              |         |

|                               |              |              |       |              |              |       |
|-------------------------------|--------------|--------------|-------|--------------|--------------|-------|
| Anesthesia mode, n (%)        |              |              | 0.484 |              |              | 0.508 |
| General Anesthesia            | 8(15.1)      | 16(9.9)      |       | 4(18.2)      | 20(10.4)     |       |
| Local Anesthesia              | 28(52.8)     | 98(60.5)     |       | 12(54.5)     | 114(59.1)    |       |
| Conscious Sedation            | 17(32.1)     | 48(29.6)     |       | 6(27.3)      | 59(30.6)     |       |
| Procedure process             |              |              |       |              |              |       |
| OTP, median (IQR)             | 335(260-420) | 290(205-360) | 0.010 | 330(290-367) | 300(210-390) | 0.075 |
| OTR, median (IQR)             | 386(315-510) | 347(260-423) | 0.008 | 392(351-453) | 350(268-447) | 0.046 |
| Collateral, n (%)             |              |              | 0.027 |              |              | 0.012 |
| poor                          | 23(43.4)     | 44(27.2)     |       | 12(54.5)     | 55(28.5)     |       |
| good                          | 30(56.6)     | 118(72.8)    |       | 10(45.5)     | 138(71.5)    |       |
| First Attempt Approach, n (%) |              |              | 0.052 |              |              | 0.158 |
| Stent retriever               | 17(32.1)     | 42(25.9)     |       | 5(22.7)      | 54(28.0)     |       |
| Direct aspiration             | 30(56.6)     | 72(44.4)     |       | 14(63.6)     | 88(45.6)     |       |
| Stent retriever + aspiration  | 2(3.8)       | 11(6.8)      |       | 2(9.1)       | 11(5.7)      |       |
| Balloon/stenting angioplasty  | 4(7.5)       | 37(22.8)     |       | 1(4.5)       | 40(20.7)     |       |
| eTICI                         |              |              | 0.641 |              |              | 0.212 |
| 2b50 (50-66%)                 | 7(13.2)      | 21(13.0)     |       | 5(22.7)      | 23(11.9)     |       |
| 2b67 (67-89%)                 | 9(17.0)      | 18(11.1)     |       | 4(18.2)      | 23(11.9)     |       |
| 2c                            | 9(17.0)      | 24(14.8)     |       | 1(4.5)       | 32(16.6)     |       |
| 3                             | 28(52.8)     | 99(61.1)     |       | 12(54.5)     | 115(59.6)    |       |
| mCCT, sec, median (IQR)       | 3.9(3.1-4.7) | 3.4(2.9-4.2) | 0.025 | 4.2(3.0-4.5) | 3.4(3.0-4.4) | 0.093 |

**Abbreviations:** ASPECT, Alberta Stroke Program Early CT; CE, cardioembolic; DBP, diastolic blood pressure; eTICI, expanded Thrombolysis in Cerebral Infarction; ICA, internal carotid artery; ICH, intracerebral hemorrhage, IQR, interquartile range; IV-rtPA, intravenous alteplase; LAA, large-artery atherosclerosis; MCA-M1, M1 segment of the middle cerebral artery; MCA-M2, M2 segment of the middle cerebral artery; mCCT,

microvascular cerebral circulation time; mRS, modified Rankin Scale; NIHSS, National Institutes of Health Stroke Scale; OTP, onset-to-puncture time; OTR, onset-to-reperfusion time; SBP, systolic blood pressure; SD, standard deviation; TOAST, the Trial of ORG 10172 in Acute Stroke Treatment



**Table S4 Logistic Regression Analyses for Intracerebral Hemorrhage**

| Independent variable | Aadjusted OR(95%CI) | P-value |
|----------------------|---------------------|---------|
| Any ICH              |                     |         |
| Age                  | 1.014(0.975-1.056)  | 0.483   |
| Admission ASPECT     | 0.756(0.645-0.885)  | 0.001   |
| IV-rtPA              | 3.605(1.384-9.392)  | 0.009   |
| TOAST                |                     |         |
| LAA                  | Reference           |         |
| CE                   | 6.040(1.789-20.394) | 0.004   |
| Others               | 2.636(0.613-11.324) | 0.193   |
| OTR                  | 1.002(1.000-1.004)  | 0.019   |
| Collateral           | 1.417(0.607-3.305)  | 0.420   |
| mCCT                 | 1.103(0.796-1.528)  | 0.556   |
| Parenchymal hematoma |                     |         |
| Age                  | 1.017(0.956-1.082)  | 0.593   |
| Atrial fibrillation  | 3.072(0.661-14.290) | 0.152   |
| Admission ASPECT     | 0.725(0.597-0.881)  | 0.001   |
| OTR                  | 1.001(0.999-1.004)  | 0.372   |
| Collateral           | 0.951(0.320-2.825)  | 0.928   |
| mCCT                 | 1.085(0.708-1.661)  | 0.708   |

**Abbreviations:** ASPECT, Alberta Stroke Program Early CT; CE, cardioembolic; CI, confidence intervals; ICH, intracerebral hemorrhage; IV-rtPA, intravenous alteplase; LAA, large-artery atherosclerosis; mCCT, microvascular cerebral circulation time; OR, odds ratio; OTR, onset-to-reperfusion time; TOAST, the Trial of ORG 10172 in Acute Stroke Treatment

**Table S5 Kendall's W test for TTP and CCT**

| Independent variable     | Kendall's W | P-value |
|--------------------------|-------------|---------|
| TTP <sub>C5,sec</sub>    | 0.952       | <0.001  |
| TTP <sub>M4,sec</sub>    | 0.965       | <0.001  |
| TTP <sub>VR,sec</sub>    | 0.948       | <0.001  |
| CCT <sub>C5-M4,sec</sub> | 0.946       | <0.001  |
| CCT <sub>C5-VR,sec</sub> | 0.945       | <0.001  |
| CCT <sub>M4-VR,sec</sub> | 0.919       | <0.001  |

**Abbreviations:** CCT<sub>C5-M4</sub>, cerebral circulation time from the vertical intracavernous portion of the internal carotid artery to the cortical segment of the rolandic artery; CCT<sub>C5-VR</sub>, cerebral circulation time from the vertical intracavernous portion of the internal carotid artery to the rolandic vein; CCT<sub>M4-VR</sub>, cerebral circulation time from the cortical segment of the rolandic artery to the rolandic vein; TTP<sub>C5</sub>, time to peak of the vertical intracavernous portion of the internal carotid artery, TTP<sub>M4</sub>, time to peak of the cortical segment of the rolandic artery; TTP<sub>VR</sub>, time to peak of the rolandic vein.
